# Supplementary material for: The Cancer Moonshot Immuno-Oncology Translational Network at 5: accelerating cancer immunotherapies
Source: PubMed Central journal article supplement (PMC10637038; doi:10.1093/jnci/djad151), 2023-08-12
Supplement: djad151_supplementary_data.pdf [file djad151_supplementary_data.pdf]

**Supplementary Materials**

Annapragada et al. Cancer Moonshot Immuno-Oncology Translational Network (IOTN)

**Supplementary Table 1: Members of the IOTN Clinical Trials Task Force (CTTF)**

| <b>Member Name</b>           | <b>Affiliation</b>                             | <b>CTTF designation</b> |
|------------------------------|------------------------------------------------|-------------------------|
| <b>Kunle Odunsi</b>          | IOTN/ University of Chicago Medicine           | CTTF Chair              |
| <b>Andrew Sikora</b>         | IOTN/ MD Anderson Cancer Center                | CTTF Co-Chair           |
| <b>Ananth Annapragada</b>    | IOTN/ Baylor College of Medicine               | Member                  |
| <b>Michael Demetriou</b>     | IOTN/ University of California- Irvine         | Member                  |
| <b>Lawrence Fong</b>         | IOTN/ University of California- San Francisco  | Member                  |
| <b>Jinming Gao</b>           | IOTN/ University of Texas Southwestern         | Member                  |
| <b>Alan Hutson</b>           | IOTN/ Roswell Park Comprehensive Cancer Center | Member                  |
| <b>Donald Kufe</b>           | IOTN/ Dana Farber Cancer Institute             | Member                  |
| <b>Song Liu</b>              | IOTN/ Roswell Park Comprehensive Cancer Center | Member                  |
| <b>Zachary Morris</b>        | IOTN/ University of Wisconsin-Madison          | Member                  |
| <b>Eduardo Vilar-Sanchez</b> | IOTN/ MD Anderson Cancer Center                | Member                  |
| <b>Kasia Bourcier</b>        | NIH/ NCI                                       | Member                  |
| <b>Marc Ernstoff</b>         | NIH/NCI                                        | Member                  |
| <b>Lori Henderson</b>        | NIH/ NCI                                       | Member                  |
| <b>Kevin Howcroft</b>        | NIH/ NCI                                       | Member                  |
| <b>Lillian Kuo</b>           | NIH/ NCI                                       | Member                  |
| <b>Shizuko Sei</b>           | NIH/NCI                                        | Member                  |
| <b>Elad Sharon</b>           | NIH/NCI                                        | Member                  |
| <b>Robert Shoemaker</b>      | NIH/NCI                                        | Member                  |
| <b>Minkyung Song</b>         | NIH/NCI                                        | Member                  |
| <b>Anthony Welch</b>         | NIH/ NCI                                       | Member                  |
| <b>Jason Yovandich</b>       | NIH/NCI                                        | Member                  |
